# Supplementary material for: Solvent controlled nuclearity in Cu(ii) complexes linked by the CO32− ligand: synthesis, structure and magnetic properties
Source: Royal Society of Chemistry journal article supplement (doi:10.1039/b203057h), 2002-01-01
Supplement: b203057h.doc [file b203057h.doc]

EPR spectrum at 4 K for complex **3·H2O**, and its mathematical simulation
